# Supplementary material for: Evidence of cryptic methane cycling and non-methanogenic methylamine consumption in the sulfate-reducing zone of sediment in the Santa Barbara Basin, California
Source: Copernicus journal article supplement (doi:10.5194/bg-20-4377-2023), 2023-10-26
Supplement: Supplementary file 1 [file bg-20-4377-2023-supplement.pdf]

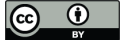

*Supplement of*

**Evidence of cryptic methane cycling and non-methanogenic methylamine consumption in the sulfate-reducing zone of sediment in the Santa Barbara Basin, California**

**Sebastian J. E. Krause et al.**

*Correspondence to:* Sebastian J. E. Krause ([sjkrause@ucsb.edu](mailto:sjkrause@ucsb.edu)) and Tina Treude ([ttreude@g.ucla.edu](mailto:ttreude@g.ucla.edu))

The copyright of individual parts of the supplement might differ from the article licence.

## Supplemental Material

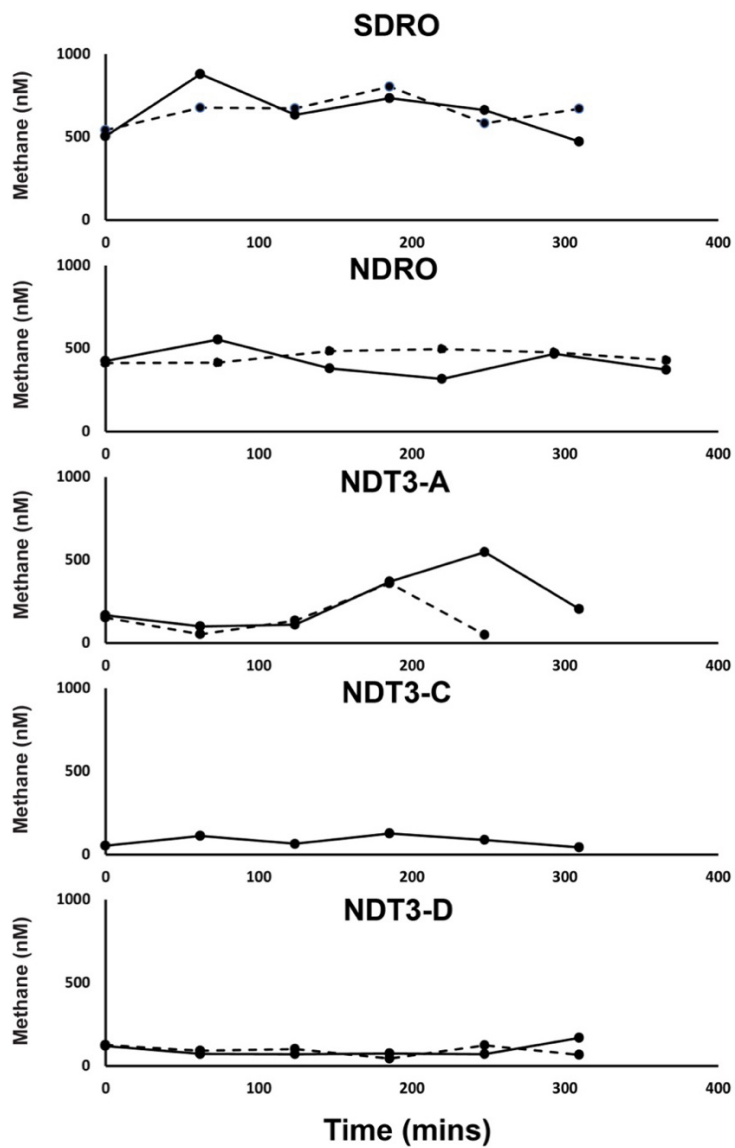

**Figure S1.** Methane concentrations from benthic flux chamber experiments across the depth transect of the Santa Barbara Basin. Solid lines are methane concentrations from benthic flux chamber 1. Dashed lines are methane concentrations from benthic flux chamber 2.

**Table S1.** Porewater concentrations of acetate, methanol and methylamine detected within two sediment intervals at each station sampled in this study.

| <b>Station, Sediment<br/>Depth (cm)</b> | <b>Acetate<br/>(<math>\mu\text{M}</math>)</b> | <b>Methanol<br/>(<math>\mu\text{M}</math>)</b> | <b>Methylamine<br/>(<math>\mu\text{M}</math>)</b> |
|-----------------------------------------|-----------------------------------------------|------------------------------------------------|---------------------------------------------------|
| SDRO, 1-2cm                             | BQ                                            | BD                                             | BQ                                                |
| SDRO, 9-10 cm                           | BD                                            | BD                                             | BD                                                |
| NDRO, 1-2 cm                            | BQ                                            | BD                                             | BD                                                |
| NDRO, 9-10 cm                           | BD                                            | BD                                             | BD                                                |
| NDT3-A, 1-2 cm                          | 21                                            | BQ                                             | BQ                                                |
| NDT3-A, 9-10 cm                         | BD                                            | BD                                             | BD                                                |
| NDT3-C, 1-2 cm                          | BD                                            | BD                                             | BD                                                |
| NDT3-C, 9-10 cm                         | BD                                            | BD                                             | BD                                                |
| NDT3-D, 1-2 cm                          | BD                                            | BD                                             | BD                                                |
| NDT3-D, 9-10 cm                         | BD                                            | BD                                             | BD                                                |

**Table S2.** Porewater concentrations of methane and ex situ rate data and rate constants (k) of AOM from directly from  $^{14}\text{C-CH}_4$  (AOM-  $\text{CH}_4$ ), AOM derived from  $^{14}\text{C}$ -mono-methylamine (AOM-MMA), and methanogenesis from  $^{14}\text{C}$ -mono-methylamine (MG-MMA).

| Station | Sediment Depth For methane (cm) | Methane ( $\mu\text{M}$ ) | Sediment Depth for Rates (cm) | AOM- $\text{CH}_4$ ( $\text{nmol cm}^{-3} \text{d}^{-1}$ ) | AOM- $\text{CH}_4$ k ( $\text{d}^{-1}$ ) | AOM-MMA ( $\text{nmol cm}^{-3} \text{d}^{-1}$ ) | AOM-MMA k ( $\text{d}^{-1}$ ) | MG-MMA ( $\text{nmol cm}^{-3} \text{d}^{-1}$ ) | MG-MMA k ( $\text{d}^{-1}$ ) |
|---------|---------------------------------|---------------------------|-------------------------------|------------------------------------------------------------|------------------------------------------|-------------------------------------------------|-------------------------------|------------------------------------------------|------------------------------|
| SDRO    | 0.5                             | 10.80                     | 0.5                           | 0.92                                                       | 0.09                                     | 9.95                                            | 0.92                          | 0.40                                           | 0.13                         |
| SDRO    | 1.5                             | 7.04                      | 1.5                           | 0.29                                                       | 0.04                                     | 6.49                                            | 0.92                          | 0.45                                           | 0.15                         |
| SDRO    | 2.5                             | 6.56                      | 2.5                           | 0.03                                                       | 0.00                                     | 6.03                                            | 0.92                          | 0.29                                           | 0.10                         |
| SDRO    | 3.5                             | 5.68                      | 3.5                           | 0.01                                                       | 0.00                                     | 0.00                                            | 0.00                          | 0.18                                           | 0.06                         |
| SDRO    | 4.5                             | 7.65                      | 4.5                           | 0.00                                                       | 0.00                                     | 7.02                                            | 0.92                          | 0.32                                           | 0.11                         |
| SDRO    | 5.5                             | 5.83                      | 5.5                           | 0.01                                                       | 0.00                                     | 5.37                                            | 0.92                          | 0.41                                           | 0.14                         |
| SDRO    | 6.5                             | 10.89                     | 6.5                           | 0.00                                                       | 0.00                                     | 10.02                                           | 0.92                          | 0.31                                           | 0.10                         |
| SDRO    | 7.5                             | 10.12                     | 7.5                           | 0.00                                                       | 0.00                                     | 9.31                                            | 0.92                          | 0.29                                           | 0.10                         |
| SDRO    | 8.5                             | -                         | 8.5                           | 0.01                                                       | 0.00                                     | 0.00                                            | 0.00                          | 0.33                                           | 0.11                         |
| SDRO    | 9.5                             | -                         | 9.5                           | 0.01                                                       | 0.00                                     | 0.00                                            | 0.00                          | 0.28                                           | 0.09                         |
| SDRO    | 11                              | -                         | 10.5                          | 0.02                                                       | 0.00                                     | 9.14                                            | 0.90                          | 0.28                                           | 0.09                         |
| SDRO    | 13                              | -                         | 11.5                          | 0.00                                                       | 0.00                                     | 9.15                                            | 0.90                          | 0.30                                           | 0.10                         |
| SDRO    | 15                              | -                         | 12.5                          | 0.00                                                       | 0.00                                     | 9.17                                            | 0.91                          | 0.24                                           | 0.08                         |
| SDRO    | 17                              | -                         | 13.5                          | 0.00                                                       | 0.00                                     | 9.17                                            | 0.91                          | 0.27                                           | 0.09                         |
| SDRO    | 19                              | -                         | 14.5                          | 0.00                                                       | 0.00                                     | 0.00                                            | 0.00                          | 0.26                                           | 0.09                         |
| NDRO    | 0.5                             | 5.96                      | 0.5                           | 0.05                                                       | 0.01                                     | 5.31                                            | 0.89                          | 0.41                                           | 0.14                         |
| NDRO    | 1.5                             | 11.10                     | 1.5                           | 0.05                                                       | 0.00                                     | 0.00                                            | 0.00                          | 0.29                                           | 0.10                         |
| NDRO    | 2.5                             | 3.55                      | 2.5                           | 0.00                                                       | 0.00                                     | 0.00                                            | 0.00                          | 0.28                                           | 0.09                         |
| NDRO    | 3.5                             | 11.72                     | 3.5                           | 0.02                                                       | 0.00                                     | 0.00                                            | 0.00                          | 0.31                                           | 0.10                         |
| NDRO    | 4.5                             | 3.96                      | 4.5                           | 0.01                                                       | 0.00                                     | 0.00                                            | 0.00                          | 0.43                                           | 0.14                         |
| NDRO    | 5.5                             | 9.26                      | 5.5                           | 0.00                                                       | 0.00                                     | 8.35                                            | 0.90                          | 0.34                                           | 0.11                         |
| NDRO    | 6.5                             | 8.28                      | 6.5                           | 0.00                                                       | 0.00                                     | 7.50                                            | 0.91                          | 0.35                                           | 0.12                         |
| NDRO    | 7.5                             | 7.67                      | 7.5                           | 0.00                                                       | 0.00                                     | 0.00                                            | 0.00                          | 0.36                                           | 0.12                         |
| NDRO    | 8.5                             | 9.51                      | 8.5                           | 0.00                                                       | 0.00                                     | 0.00                                            | 0.00                          | 0.30                                           | 0.10                         |
| NDRO    | 9.5                             | 5.33                      | 9.5                           | 0.00                                                       | 0.00                                     | 0.00                                            | 0.00                          | 0.22                                           | 0.07                         |
| NDRO    | 11                              | 10.46                     | 10.5                          | 0.00                                                       | 0.00                                     | 0.00                                            | 0.00                          | 0.21                                           | 0.07                         |
| NDRO    | 13                              | 5.58                      | 11.5                          | 0.01                                                       | 0.00                                     | 0.00                                            | 0.00                          | 0.21                                           | 0.07                         |
| NDRO    | 15                              | 7.51                      | 12.5                          | 0.00                                                       | 0.00                                     | 0.00                                            | 0.00                          | 0.25                                           | 0.08                         |
| NDRO    | 17                              | 13.56                     | 13.5                          | 0.00                                                       | 0.00                                     | 0.00                                            | 0.00                          | 0.21                                           | 0.07                         |
| NDRO    | 19                              | 15.68                     | 14.5                          | 0.00                                                       | 0.00                                     | -                                               | -                             | -                                              | -                            |
| NDT3-A  | 0.5                             | 7.88                      | 0.5                           | 0.03                                                       | 0.00                                     | 7.09                                            | 0.90                          | 0.45                                           | 0.15                         |
| NDT3-A  | 1.5                             | 5.66                      | 1.5                           | 0.07                                                       | 0.01                                     | 5.09                                            | 0.90                          | 0.41                                           | 0.14                         |
| NDT3-A  | 2.5                             | 5.21                      | 2.5                           | 0.04                                                       | 0.01                                     | 4.66                                            | 0.90                          | 0.27                                           | 0.09                         |
| NDT3-A  | 3.5                             | 4.03                      | 3.5                           | 0.00                                                       | 0.00                                     | 3.62                                            | 0.90                          | 0.29                                           | 0.10                         |
| NDT3-A  | 4.5                             | 7.92                      | 4.5                           | 0.01                                                       | 0.00                                     | 7.11                                            | 0.90                          | 0.33                                           | 0.11                         |
| NDT3-A  | 5.5                             | 2.68                      | 5.5                           | 0.00                                                       | 0.00                                     | 2.40                                            | 0.90                          | 0.34                                           | 0.11                         |
| NDT3-A  | 6.5                             | 8.81                      | 6.5                           | 0.00                                                       | 0.00                                     | 7.91                                            | 0.90                          | 0.32                                           | 0.11                         |
| NDT3-A  | 7.5                             | 4.05                      | 7.5                           | 0.00                                                       | 0.00                                     | 3.64                                            | 0.90                          | 0.32                                           | 0.11                         |
| NDT3-A  | 8.5                             | 8.70                      | 8.5                           | 0.00                                                       | 0.00                                     | 7.78                                            | 0.89                          | 0.24                                           | 0.08                         |
| NDT3-A  | 9.5                             | 4.62                      | 9.5                           | 0.00                                                       | 0.00                                     | 4.14                                            | 0.90                          | 0.24                                           | 0.08                         |
| NDT3-A  | 11                              | 5.29                      | 10.5                          | 0.00                                                       | 0.00                                     | 0.00                                            | 0.00                          | 0.18                                           | 0.06                         |
| NDT3-A  | 13                              | -                         | 11.5                          | 0.00                                                       | 0.00                                     | 4.71                                            | 0.89                          | 0.27                                           | 0.09                         |
| NDT3-A  | 15                              | -                         | 12.5                          | 0.00                                                       | 0.00                                     | 0.00                                            | 0.00                          | 0.25                                           | 0.08                         |
| NDT3-A  | 17                              | -                         | 13.5                          | 0.00                                                       | 0.00                                     | 0.00                                            | 0.00                          | 0.26                                           | 0.09                         |
| NDT3-A  | 19                              | -                         | 14.5                          | 0.00                                                       | 0.00                                     | 0.00                                            | 0.00                          | 0.26                                           | 0.09                         |
| NDT3-C  | 0.5                             | 5.21                      | 0.5                           | 1.68                                                       | 0.32                                     | 4.28                                            | 0.82                          | 0.33                                           | 0.11                         |
| NDT3-C  | 1.5                             | 8.47                      | 1.5                           | 0.08                                                       | 0.01                                     | 6.94                                            | 0.82                          | 0.26                                           | 0.09                         |
| NDT3-C  | 2.5                             | 9.38                      | 2.5                           | 0.06                                                       | 0.01                                     | 0.00                                            | 0.00                          | 0.00                                           | 0.00                         |
| NDT3-C  | 3.5                             | 5.82                      | 3.5                           | 0.33                                                       | 0.06                                     | 4.79                                            | 0.82                          | 0.28                                           | 0.09                         |
| NDT3-C  | 4.5                             | 5.99                      | 4.5                           | 0.05                                                       | 0.01                                     | 4.88                                            | 0.81                          | 0.22                                           | 0.07                         |
| NDT3-C  | 5.5                             | 6.79                      | 5.5                           | 0.07                                                       | 0.01                                     | 0.00                                            | 0.00                          | 0.05                                           | 0.02                         |
| NDT3-C  | 6.5                             | 7.22                      | 6.5                           | 0.02                                                       | 0.00                                     | 5.66                                            | 0.78                          | 0.19                                           | 0.06                         |
| NDT3-C  | 7.5                             | 7.25                      | 7.5                           | 0.03                                                       | 0.00                                     | 0.00                                            | 0.00                          | 0.01                                           | 0.00                         |
| NDT3-C  | 8.5                             | 11.10                     | 8.5                           | 0.13                                                       | 0.01                                     | 9.17                                            | 0.83                          | 0.19                                           | 0.06                         |
| NDT3-C  | 9.5                             | 7.24                      | 9.5                           | 0.01                                                       | 0.00                                     | 5.69                                            | 0.79                          | 0.22                                           | 0.07                         |
| NDT3-C  | 11                              | 7.24                      | 10.5                          | 0.04                                                       | 0.01                                     | 5.14                                            | 0.71                          | 0.22                                           | 0.07                         |
| NDT3-C  | 13                              | 6.38                      | 11.5                          | -                                                          | -                                        | -                                               | -                             | -                                              | -                            |
| NDT3-C  | 15                              | 7.73                      | 12.5                          | -                                                          | -                                        | -                                               | -                             | -                                              | -                            |
| NDT3-C  | 17                              | 9.19                      | 13.5                          | -                                                          | -                                        | -                                               | -                             | -                                              | -                            |
| NDT3-D  | 0.5                             | 12.29                     | 0.5                           | 4.52                                                       | 0.37                                     | 0.00                                            | 0.00                          | 0.05                                           | 0.02                         |
| NDT3-D  | 1.5                             | 12.75                     | 1.5                           | 1.76                                                       | 0.14                                     | 15.91                                           | 1.25                          | 0.34                                           | 0.11                         |
| NDT3-D  | 2.5                             | 10.26                     | 2.5                           | 0.95                                                       | 0.09                                     | 12.76                                           | 1.24                          | 0.25                                           | 0.08                         |
| NDT3-D  | 3.5                             | 9.93                      | 3.5                           | 0.49                                                       | 0.05                                     | 12.36                                           | 1.24                          | 0.25                                           | 0.08                         |
| NDT3-D  | 4.5                             | 11.86                     | 4.5                           | -                                                          | -                                        | 14.80                                           | 1.25                          | 0.22                                           | 0.07                         |
| NDT3-D  | 5.5                             | 8.88                      | 5.5                           | -                                                          | -                                        | 11.07                                           | 1.25                          | 0.19                                           | 0.06                         |
| NDT3-D  | 6.5                             | 10.20                     | 6.5                           | 0.12                                                       | 0.01                                     | 12.62                                           | 1.24                          | 0.20                                           | 0.07                         |
| NDT3-D  | 7.5                             | 9.31                      | 7.5                           | 0.01                                                       | 0.00                                     | 11.48                                           | 1.23                          | 0.23                                           | 0.08                         |
| NDT3-D  | 8.5                             | 8.58                      | 8.5                           | 0.02                                                       | 0.00                                     | 10.73                                           | 1.25                          | 0.22                                           | 0.07                         |
| NDT3-D  | 9.5                             | 9.11                      | 9.5                           | 0.41                                                       | 0.05                                     | 9.95                                            | 1.09                          | 0.30                                           | 0.10                         |
| NDT3-D  | 11                              | 12.19                     | 10.5                          | 0.26                                                       | 0.02                                     | 12.35                                           | 1.01                          | 0.38                                           | 0.13                         |
| NDT3-D  | 13                              | 11.29                     | 11.5                          | 0.49                                                       | 0.04                                     | 9.05                                            | 0.80                          | 0.47                                           | 0.16                         |
| NDT3-D  | 15                              | 9.88                      | 12.5                          | -                                                          | -                                        | -                                               | -                             | -                                              | -                            |
| NDT3-D  | 17                              | 9.14                      | 13.5                          | -                                                          | -                                        | -                                               | -                             | -                                              | -                            |
| NDT3-D  | 19                              | 10.26                     | 14.5                          | -                                                          | -                                        | -                                               | -                             | -                                              | -                            |
